# Supplementary material for: Aromaticity on the edge of chaos: An ab initio study of the bimodal balance between aromatic and non-aromatic structures for 10π-dihetero[8]annulenes
Source: Royal Society of Chemistry journal article supplement (doi:10.1039/b312724a), 2004-01-01
Supplement: b312724a.pdf [file b312724a.pdf]

# Aromaticity on the Edge of Chaos: An *Ab initio* study of the bimodal balance between aromatic and non-aromatic structures for 10- $\pi$ -Dihetero[8]annulenes.

Henry S. Rzepa\* and Nikola Sanderson

Department of Chemistry, Imperial College London, SW7 2AY

**Summary:** The computed geometries of a class of 10- $\pi$ -annulenes containing two heteroatoms, which exhibit an acutely sensitive balance between  $\pi$  and  $\sigma$  influences upon ring planarity, reveal that the recent KMLYP hybridisation of the exchange functional in the DFT method is qualitatively superior to the more commonly used B3LYP hybrid for modelling the aromaticity of such systems.

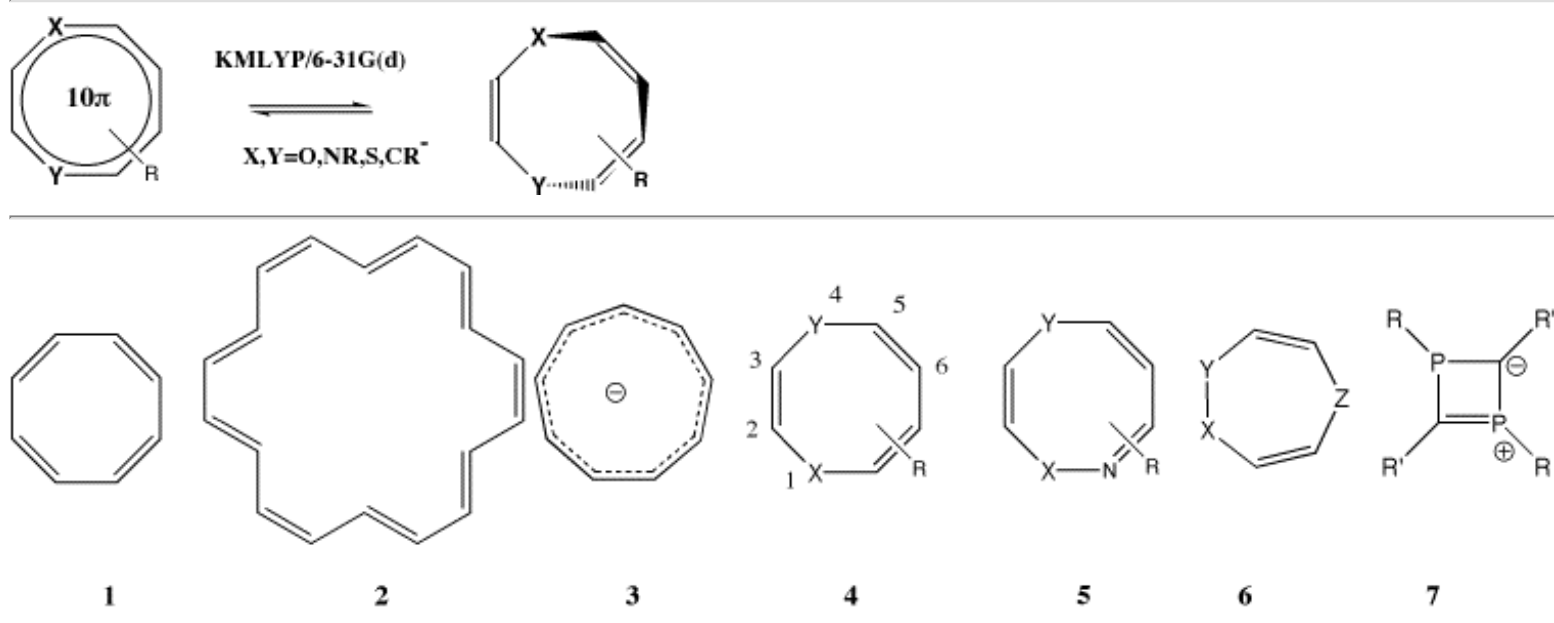

## Electronic Supplemental Information

Coordinates are available in the form of Molfiles or PDB files. These can be viewed if the appropriate Browser plugin is installed such as [Chime](#) or Chem3D Viewer.

**Table 1. Geometries, Energies and NICS values for 4 - 6.**

| B3LYP/KMLYP 6-31G(d) Energy, Hartree<br>NICS(0), ppm [B3LYP/KMLYP]  | Crystal Geometry:<br>length, Å<br>[dihedral, degrees] | Geometry (B3LYP) | Geometry (KMLYP) |
|---------------------------------------------------------------------|-------------------------------------------------------|------------------|------------------|
| <b>4, X=Y=O<sup>17</sup></b><br>-724.75782/-723.29019a,b [-7.5/0.1] |                                                       |                  |                  |

|                                                                                                     |                            |  |  |
|-----------------------------------------------------------------------------------------------------|----------------------------|--|--|
| <p>4, X=Y=O<sup>17</sup><br/>955.53210/-954.11459 [-7.7/-7.0]</p>                                   |                            |  |  |
| <p>4, X=Y=NH<sup>18</sup><br/>-342.89994/-342.21433 [-12.9/-12.5]</p>                               |                            |  |  |
| <p>4, X=Y=N-TMS<sup>18</sup><br/>-1160.27700/-1158.59120 [-11.3/-10.8]</p>                          | <p>Reported as planar</p>  |  |  |
| <p>4, X=Y=N-CONMe<sub>2</sub><sup>19</sup><br/>-837.52547/-835.89800 [-8.5/-6.0]</p>                | <p>Reported as planar</p>  |  |  |
| <p>4, X=Y=NCO<sub>2</sub>Me<sup>19</sup><br/>-798.64839/-797.07613 [-6.0/-1.3]</p>                  |                            |  |  |
| <p>4, X=Y=N-SO<sub>2</sub>Me<sup>18</sup><br/>-1518.65134/-1516.49681<sup>c,d</sup> [-9.6/-7.4]</p> | <p>Reported as twisted</p> |  |  |

|                                                                                                     |                                      |  |  |
|-----------------------------------------------------------------------------------------------------|--------------------------------------|--|--|
| <p>5, X=Y=N-Acetyl<sup>24</sup><br/>-1715.32163/-1712.39694 [-0.8/-0.6]</p>                         |                                      |  |  |
| <p>4, X=O, Y=N, R'=(3,4,5-trimethoxybenzyl)<sup>20</sup><br/>-976.66132/-974.75355 [-10.0/-9.2]</p> |                                      |  |  |
| <p>4, X=O, Y=N-Tosyl<sup>20</sup><br/>-1181.67739/-1179.74661<sup>e,f</sup> [-8.9/-7.6]</p>         |                                      |  |  |
| <p>4, X=Y=S<sup>21</sup><br/>-1256.41893/-1254.75146 [-2.5/-2.4]</p>                                |                                      |  |  |
| <p>4, X=Y=S<sup>22</sup><br/>-1260.83295/-1259.16593 [-2.2/-2.0]</p>                                |                                      |  |  |
| <p>4, X=S, Y=O<sup>23</sup><br/>-2852.64265/-2849.43451 [-2.17/-2.1]</p>                            |                                      |  |  |
| <p>4, X=O, X=S<br/>-705.57218/-704.57509<sup>g</sup> [-9.2/-1.2]</p>                                | <p>unknown</p>                       |  |  |
| <p>4, X=CH-, X=S<br/>-669.09512/-668.17759 [-14.1/-14.6]</p>                                        | <p>Diatropic by NMR<sup>25</sup></p> |  |  |

|                                                       |                                |                      |                      |
|-------------------------------------------------------|--------------------------------|----------------------|----------------------|
| 4, X=CH-, X=O -346.1104603/-345.4187586 [-13.5/-13.5] | Diatropic by NMR <sup>18</sup> |                      |                      |
| 4, X=CH-, X=NH -326.249677/-325.60088 [-15.8/-16.3]   | Diatropic by NMR <sup>18</sup> |                      |                      |
| 6, X=Y=Z=NH -320.79828/-320.16244 [-8.2/-7.4]         | Unknown                        | <a href="#">36.7</a> | <a href="#">12.5</a> |

<sup>a</sup>Corrected for  $\Delta G$ : -723.15206, Total energy (MP2): [-722.61300](#) <sup>b</sup>Planar valence isomer; total energy (KMLYP/MP2) [-723.29133/722.61166](#). Corrected for  $\Delta G$ (KMLYP): -723.14989, NICS(KMLYP) = -6.1. <sup>c</sup> Total energy (MP2): [-1515.42207](#) <sup>d</sup> Non-planar isomer (MP2); [-1515.42046](#), C3-X4-C5-C6 dihedral = 82.5°. <sup>e</sup> Corrected for  $\Delta G$ : -1179.53934. Total energy (MP2); [-1139.55775](#). <sup>f</sup>Non-planar isomer; total energy (KMLYP/MP2) [-1179.74319/-1139.55812](#) Corrected for  $\Delta G$ (KMLYP): -1179.53740. NICS(KMLYP) = -1.2. C3-X4-C5-C6 dihedral (KMLYP) = 82.5°. <sup>g</sup>Valence isomers; total energy (B3LYP/KMLYP) [-705.56747/-704.57398](#) [-1.6/-8.6]. Transition state for interconversion (KMLYP): [-704.57242](#) [-4.1]

## References

1. J. J. Thomsen, *Phil. Mag*, 1921, **41**, 510; E. C. Crocker, *J. Am. Chem. Soc.*, 1922, **44**, 1618.
2. M. J. S. Dewar, *Nature*, 1945, **155**, 50.
3. W. G. Penney *Proc. Roy. Soc.*, 1934, **146**, 223
4. Lennard-Jones, *Proc. Roy. Soc.*, 1937, **158**, 297-305
5. D. H. R. Barton and R. C. Cookson, *Quart. Revs.*, 1956, **10**, 44-82.
6. W. Baker, *J. Chem. Soc.*, 1945, 258-267
7. R. Breslow, *Chem. Eng. News*, 1965, **43(26)**, 90-9.
8. E. Huckel, *Z. Physik*, 1936, **70**, 204; A. Streitwieser, "Molecular Orbital Theory for Organic Chemists", John Wiley and Sons, New York, 1961.
9. C. S. Wannere, D. Moran, N. L. Allinger, B. Andes Hess, Jr., L. J. Schaad, and P. von RaguŽ Schleyer *Org. Lett.*, 2003, **5**, 2983-2986.
10. S. Gorter, E. Rutten-Keulemans, M. Krever, C. Romers and D. W. J. Cruickshank, *Acta Crystallogr., Sect. B: Struct. Sci.*, 1995, **51**, 1036.
11. R. Bianchi, T. Pilati and M. Simonetta *Acta Crystallogr., Sect. B: Struct. Crystallogr. Cryst. Chem.*, **36**, 3146, 1980
12. R. A. King, T. D. Crawford, J. F. Stanton and H. F. Schaefer, III, *J. Am. Chem. Soc.* 1999, **121**, 10788-10793; V. G. Boche, H. Weber, D. Martens, A. Bieberbach, *Chem. Ber.*, 1978, **111**, 2480-2496. We note here that optimisation at the KMLYP/6-31(d) level retains planarity.
13. J. K. Kang and C. B. Musgrave, *J. Chem. Phys.*, 2001, **115**, 11040;
14. Gaussian 98 (Revision A.11), M. J. Frisch, G. W. Trucks, H. B. Schlegel, G. E. Scuseria, M. A. Robb, J. R. Cheeseman, V. G. Zakrzewski, J. A. Montgomery, Jr., R. E. Stratmann, J. C. Burant, S. Dapprich, J. M. Millam, A. D. Daniels, K. N. Kudin, M. C. Strain, O. Farkas, J. Tomasi, V. Barone, M. Cossi, R. Cammi, B. Mennucci, C. Pomelli, C. Adamo, S. Clifford, J. Ochterski, G. A. Petersson, P. Y. Ayala, Q. Cui, K. Morokuma, D. K. Malick, A. D. Rabuck, K. Raghavachari, J. B. Foresman, J. Cioslowski, J. V. Ortiz, A. G. Baboul, B. B. Stefanov, G. Liu, A. Liashenko, P. Piskorz, I. Komaromi, R. Gomperts, R. L. Martin, D. J. Fox, T. Keith, M. A. Al-Laham, C. Y. Peng, A. Nanayakkara, C. Gonzalez, M. Challacombe, P. M. W. Gill, B. G. Johnson, W. Chen, M. W. Wong, J. L. Andres, M. Head-Gordon, E. S. Replogle and J. A. Pople, Gaussian, Inc., Pittsburgh PA, 1998.
15. M. Mauksch, V. Gogonea, H. Jiao and P. von R. Schleyer *Angew. Chemie Int. Edition*, 1998, **37**, 2395.; P. von R. Schleyer, C. Maerker, A. Dransfeld, H. Jiao, and N. J. R. van Eikema Hommes, *J. Am. Chem. Soc.*, 1996, **118**, 6317; H. Jiao and P. von R. Schleyer, *J. Phys. Org. Chem.*, 1998, **11**, 655.

16. P. von R. Schleyer, and C. Wannere, *Abstracts Papers, 225th ACS National Meeting*, New Orleans, LA, United States, March 23-27, 2003, COMP-154.
17. CUCWEW, CUWWIA : H.-J. Altenbach, J. Lex, D. Linkenheil, B. Voss and E. Vogel *Angew. Chem. Int. Ed. Engl.*, 1984, **23**, 966.
18. DHDZOC, MSIHDZ, MSHDAZ: H.-J. Altenbach, H. Stegelmeier, M. Wilhelm, B. Voss, J. Lex and E. Vogel *Angew. Chem. Int. Ed. Engl.*, 1979, **18**, 962.
19. MXCHAZ, MCBHDZ: M. Breuninger, B. Gallenkamp, K.-H. Muller, H. Fritz, H. Prinzbach, J. J. Daly and P. Schonholzer *Angew. Chem. Int. Ed. Engl.*, 1979, **18**, 964.
20. COGPIX, COGPETB: B. Zipperer, D. Hunkler, H. Fritz, G. Rihs and H. Prinzbach *Angew. Chem., Int. Ed. Engl.*, 1984, **23**, 309.
21. ACXDTC: H. J. Eggelte, F. Bickelhaupt and B.O. Loopstra *Tetrahedron*, 1978, **34**, 3631.
22. DMBTOC: J. C. Barnes, W. Schroth and L. Moegel, *Acta Crystallogr., Sect B: Struct. Crystallogr. Cryst. Chem.*, 34, 3833, 1978
23. FUVWEH: O. Meth-Cohn and E. Vuorinen, *Chem. Commun.*, 1988, 138.
24. CAXZBT: K. Kamiya, Y. Wada and M. Nishikawa, *Chem. Pharm. Bull.*, 21, 1520, 1973
25. M. Fletschinger, B. Zipperer, H. Fritz and H. Prinzbach, *Tetrahedron Letts*, 1987, **28**, 2517-20.
26. E. Heilbronner, *Tetrahedron Lett.*, 1964, **29**, 1923; M. Mauksch, V. Gogonea, H. Jiao and P. v. R. Schleyer *Angew. Chemie Int. Edition, Engl.*, 1998, **37**, 2395; C. J. Kastrup, S. Oldfield and H. S. Rzepa, *ChemComm.*, 2002, 6452-643.
27. ETZPCN: A. F. Cameron and A. A. Freer *Acta Crystallogr., Sect. B: Struct. Crystallogr. Cryst. Chem.* 1974, **30**, 2696.
28. HOBXIF: K. Shimada, M. Asahida, K. Takahashi, Y. Sato, S. Aoyagi, Y. Takikawa and C. Kabuto *Chem. Lett.*, 1998, 513.
29. YOBBAS: E. Niecke, A. Fuchs, F. Baumeister, M. Nieger, W. W. Schoeller *Angew. Chem., Int. Ed. Engl.*, **34**, 555, 1995.
